# Supplementary material for: Anti-pituitary antibodies and susceptible human leukocyte antigen alleles as predictive biomarkers for pituitary dysfunction induced by immune checkpoint inhibitors
Source: PubMed Central journal article supplement — J Immunother Cancer. 2021 May 19;9(5):e002493. doi: 10.1136/jitc-2021-002493 (PMC8137231; doi:10.1136/jitc-2021-002493), 2021-05-19
Supplement: jitc-2021-002493supp001.pdf [file jitc-2021-002493supp001.pdf]

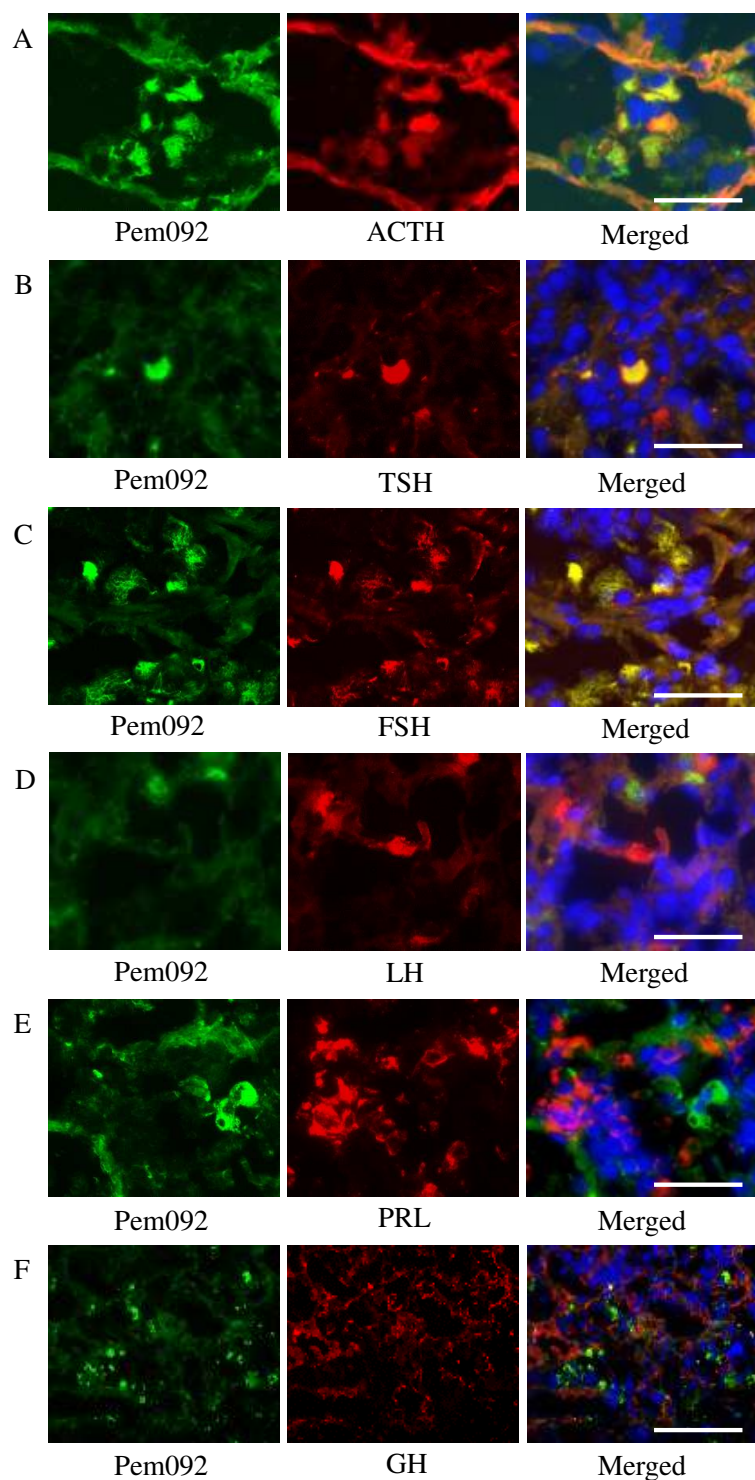

**Supplementary Figure S1. Double IIF staining with anti-pituitary antibodies (APAs) and anterior pituitary hormone antibodies**

APA-positive cells, which were stained with serum collected at baseline from a patient (Pem092) who developed pembrolizumab-induced IAD, were merged with those stained with anti-ACTH (A), anti-TSH (B), and anti-FSH antibodies (C), but not with anti-LH (D), anti-PRL (E), and anti-GH antibodies (F).

Scale bars: 50  $\mu\text{m}$ .

1 **Supplementary Table S1. List of primary and secondary antibodies used in this study**

## 2 List of primary antibodies

| Protein | Mono/poly  | Host   | Catalog No. | Company                                                                                    | Dilution |
|---------|------------|--------|-------------|--------------------------------------------------------------------------------------------|----------|
| GH      | Polyclonal | Goat   | AF1067      | R & D Systems                                                                              | 1 : 200  |
| PRL     | Polyclonal | Goat   | sc-7805     | Santa Cruz Biotechnology                                                                   | 1 : 150  |
| ACTH    | Polyclonal | Goat   | abx430970   | Abxexa                                                                                     | 1 : 50   |
| TSH     | Polyclonal | Goat   | sc-7815     | Santa Cruz Biotechnology                                                                   | 1 : 10   |
| FSH     | Polyclonal | Goat   | sc-7797     | Santa Cruz Biotechnology                                                                   | 1:200    |
| LH      | Polyclonal | Rabbit |             | Dr. Parlow's Lab (National Hormone and Peptide Program (NHPP), Harbor-UCLA Medical Center) | 1 : 50   |

3

## 4 List of secondary antibodies

| Host   | Reactivity                                               | Wavelength      | Catalog no. | Company          | Dilution |
|--------|----------------------------------------------------------|-----------------|-------------|------------------|----------|
| Goat   | Rabbit IgG (H+L), highly cross-adsorbed                  | Alexa Fluor 568 | A-11036     | Molecular Probes | 1 : 500  |
| Donkey | Human IgG (H+L), AffiniPure F(ab') <sub>2</sub> Fragment | Alexa Fluor 488 | 709-546-149 | Jackson          | 1 : 400  |
| Donkey | Goat IgG (H+L)                                           | Alexa Fluor 568 | A-11057     | Molecular Probes | 1 : 500  |

5

6 **Supplementary Table S2. Pituitary cells recognized by anti-pituitary antibodies at baseline**  
 7 **in each patient**

| Case   | Malignancy | Pit-irAE | ACTH | TSH | FSH | LH | GH | PRL |
|--------|------------|----------|------|-----|-----|----|----|-----|
| Ipi008 | MM         | IAD      | +    | -   | +   | -  | -  | -   |
| Ipi024 | MM         | IAD      | +    | -   | +   | -  | -  | -   |
| Niv033 | MM         | IAD      | +    | -   | +   | -  | -  | -   |
| Niv060 | NSCLC      | IAD      | +    | -   | +   | -  | -  | -   |
| Niv096 | MM         | IAD      | +    | -   | +   | -  | -  | -   |
| Niv115 | HN         | IAD      | +    | -   | +   | -  | -  | -   |
| Pem021 | NSCLC      | IAD      | +    | -   | +   | -  | -  | -   |
| Pem035 | NSCLC      | IAD      | +    | +   | +   | -  | -  | -   |
| Pem047 | NSCLC      | IAD      | +    | +   | +   | +  | -  | -   |
| Pem092 | MM         | IAD      | +    | +   | +   | -  | -  | -   |
| IpN002 | RCC        | IAD      | +    | +   | +   | -  | -  | -   |
| Pem049 | NSCLC      | control  | +    | -   | +   | -  | -  | -   |

- 8 Abbreviations: Pit-irAE, pituitary immune-related adverse events; MM, malignant melanoma;  
 9 NSCLC, non-small cell lung carcinoma; HN, head and neck cancer; RCC, renal cell carcinoma;  
 10 IAD, isolated ACTH deficiency

11 **Supplementary Table S3. Pituitary cells recognized by anti-pituitary antibodies at onset in**  
 12 **each patient**

| Case   | Malignancy | Pit-irAE | ACTH | TSH | FSH | LH | GH | PRL |
|--------|------------|----------|------|-----|-----|----|----|-----|
| Ipi001 | MM         | Hypo     | +    | +   | +   | +  | +  | +   |
| Ipi005 | MM         | Hypo     | +    | +   | +   | -  | +  | -   |
| Ipi011 | MM         | Hypo     | +    | +   | +   | +  | +  | -   |
| IpN027 | MM         | Hypo     | +    | +   | +   | +  | -  | +   |
| Ipi008 | MM         | IAD      | +    | -   | +   | +  | +  | -   |
| Ipi024 | MM         | IAD      | +    | +   | +   | +  | +  | -   |
| Niv033 | MM         | IAD      | +    | -   | +   | +  | +  | -   |
| Niv060 | NSCLC      | IAD      | +    | +   | +   | +  | -  | -   |
| Niv096 | MM         | IAD      | +    | +   | +   | +  | -  | -   |
| Niv115 | HN         | IAD      | +    | +   | +   | +  | +  | -   |
| Niv209 | RCC        | IAD      | +    | +   | +   | -  | -  | -   |
| Pem007 | MM         | IAD      | +    | +   | +   | +  | +  | -   |
| Pem021 | NSCLC      | IAD      | +    | +   | +   | +  | -  | -   |
| Pem035 | NSCLC      | IAD      | +    | +   | +   | +  | -  | -   |
| Pem047 | NSCLC      | IAD      | +    | +   | +   | +  | +  | -   |
| Pem092 | MM         | IAD      | +    | +   | +   | -  | -  | -   |
| Pem098 | MM         | IAD      | +    | +   | +   | -  | -  | -   |
| Pem110 | MM         | IAD      | +    | +   | +   | +  | +  | +   |
| IpN002 | RCC        | IAD      | +    | +   | +   | +  | -  | -   |

13 Abbreviations: Pit-irAE, pituitary immune-related adverse events; MM, malignant melanoma;

14 NSCLC, non-small cell lung carcinoma; HN, head and neck cancer; RCC, renal cell carcinoma;

15 Hypo, hypophysitis; IAD, isolated ACTH deficiency
